# Supplementary material for: Roles of anion of polyoxometalate-based ionic liquids in properties of intumescent flame retardant polypropylene
Source: Royal Society of Chemistry journal article supplement (doi:10.1039/c4ra04592k), 2014-07-08
Supplement: c4ra04592k1.pdf [file c4ra04592k1.pdf]

# Roles of anion of polyoxometalate-based Ionic liquids in properties of intumescent flame retardant polypropylene

*Shengjiao Chen<sup>†,‡</sup>, Juan Li<sup>†\*</sup>, Yingke Zhu<sup>†</sup> and Shengpei Su<sup>‡\*</sup>*

<sup>†</sup> Ningbo Key Laboratory of Polymer Materials, Ningbo Institute of Material Technology and Engineering, Chinese Academy of Sciences, Ningbo, Zhejiang 315201, PR China.

<sup>‡</sup> Key Laboratory of Sustainable Resources Processing and Advanced Materials of Hunan Province, Hunan Normal University, Changsha, Hunan 410081, PR China.

## 1. Experimental

### 1.1 Preparation of PILs

1-Butyl 3-methylimidazolium chloride ([BMIm]Cl) IL was synthesized by stirring 1:1 molar ratio of MIm and [BMIm]Cl at 80°C for 24 h in nitrogen atmosphere. After recrystallization from ethyl acetate, the intermediate product was obtained. Then 0.47 g of [BMIm]Cl and 2.88 g of PWA were dissolved in deionized water, respectively, and mixed together under constant stirring for 12 h. Then a white precipitate was formed. The product was filtered and washed for several times with deionized water until chloride-free (AgNO<sub>3</sub> aqueous test). Finally, the obtained PIL1 was dried overnight at 80 °C in oven. For PIL2 and PIL3, the process were

similar to PIL1 and the weight of [BMIm]Cl and POM were 0.47g/1.82g and 0.47g/3.84g, respectively.

## **2. Results and discussion**

### **2.1 LOI and UL-94 tests**

The flame retardant properties of PP/IFR/PIL2 composites at the whole content of flame retardants 13.5 wt% and 20 wt% are shown in Table S1. It is found that with the addition of PIL2 in the range of 0.1 % to 1.0 %, all the samples of PP/IFR composites show an increase in LOI value. When 0.1% of PIL2 is added into the whole content of flame retardants 13.5 % system, the LOI value goes up clearly to 25.2 from 22.5 for PP/IFR. According to Table S1, when the PILs increase gradually, the LOI value of the samples was increased before the addition is 0.5 % and then decreased. Similar trend is also recognized of the whole content flame retardants 20.0 % system. However, all PP composites fail in the UL-94 V0 tests except PP9. More or less of catalyst cannot increase the flame retardant properties. Only an optimum content can increase the flame retardant properties, so it confirmed the conclusion once again.

### **2.2 TG-IR of IFR/PILs**

Fig. S1 shows the evolved gas phase from the thermal decomposition of IFR/PILs. The overall IR spectra for IFR/PILs and IFR are similar. Some small molecular gaseous species, such as CO<sub>2</sub>, CO, H<sub>2</sub>O, NH<sub>3</sub>, H<sub>2</sub>C=NH, C<sub>5</sub>H<sub>4</sub>, are easily identified by their characteristic transmittance: CO<sub>2</sub> at 2357, 668 cm<sup>-1</sup>, CO at 2285 and 2181 cm<sup>-1</sup>, NH<sub>3</sub> at 964, 929 cm<sup>-1</sup>; H<sub>2</sub>O at 3500-3600 cm<sup>-1</sup>; C<sub>5</sub>H<sub>4</sub> at 3333 cm<sup>-1</sup>; H<sub>2</sub>C=NH at 1629

cm<sup>-1</sup>.

**Table S1** Flame retardant properties of PP/IFR/PIL2 composites at the whole content of flame retardants 13.5 wt% and 20 wt%.

| Samples | PP<br>(wt %) | IFR<br>(wt %) | Catalyst<br>(wt %) | LOI<br>(vol %) | UL-94 | Melt<br>Dripping | t <sub>1</sub> +t <sub>2</sub>                                       |
|---------|--------------|---------------|--------------------|----------------|-------|------------------|----------------------------------------------------------------------|
| PP22    | 86.5         | 13.5          | 0                  | 22.5           | NC    | Y                | /                                                                    |
| PP23    | 86.5         | 13.4          | 0.1 PIL2           | 25.2           | NC    | Y                | 2+/<br>0+/<br>0+/<br>2+/<br>4+/<br>0+/<br>0+/<br>0+14<br>0+3<br>0+30 |
| PP24    | 86.5         | 13.25         | 0.25 PIL2          | 25.9           | NC    | Y                |                                                                      |
| PP25    | 86.5         | 13.0          | 0.5 PIL2           | 26.7           | NC    | Y                |                                                                      |
| PP26    | 86.5         | 12.5          | 1.0 PIL2           | 25.4           | NC    | Y                |                                                                      |
| PP27    | 80           | 20            | 0                  | 24.5           | NC    | Y                |                                                                      |
| PP28    | 80           | 19.9          | 0.1 PIL2           | 28.2           | NC    | Y                |                                                                      |
| PP29    | 80           | 19.75         | 0.25 PIL2          | 28.0           | V-1   | N/N              |                                                                      |
| PP30    | 80           | 19.5          | 0.5 PIL2           | 30.2           | V-0   | N/N              |                                                                      |
| PP31    | 80           | 19            | 1.0 PIL2           | 30.1           | V-1   | N/N              |                                                                      |

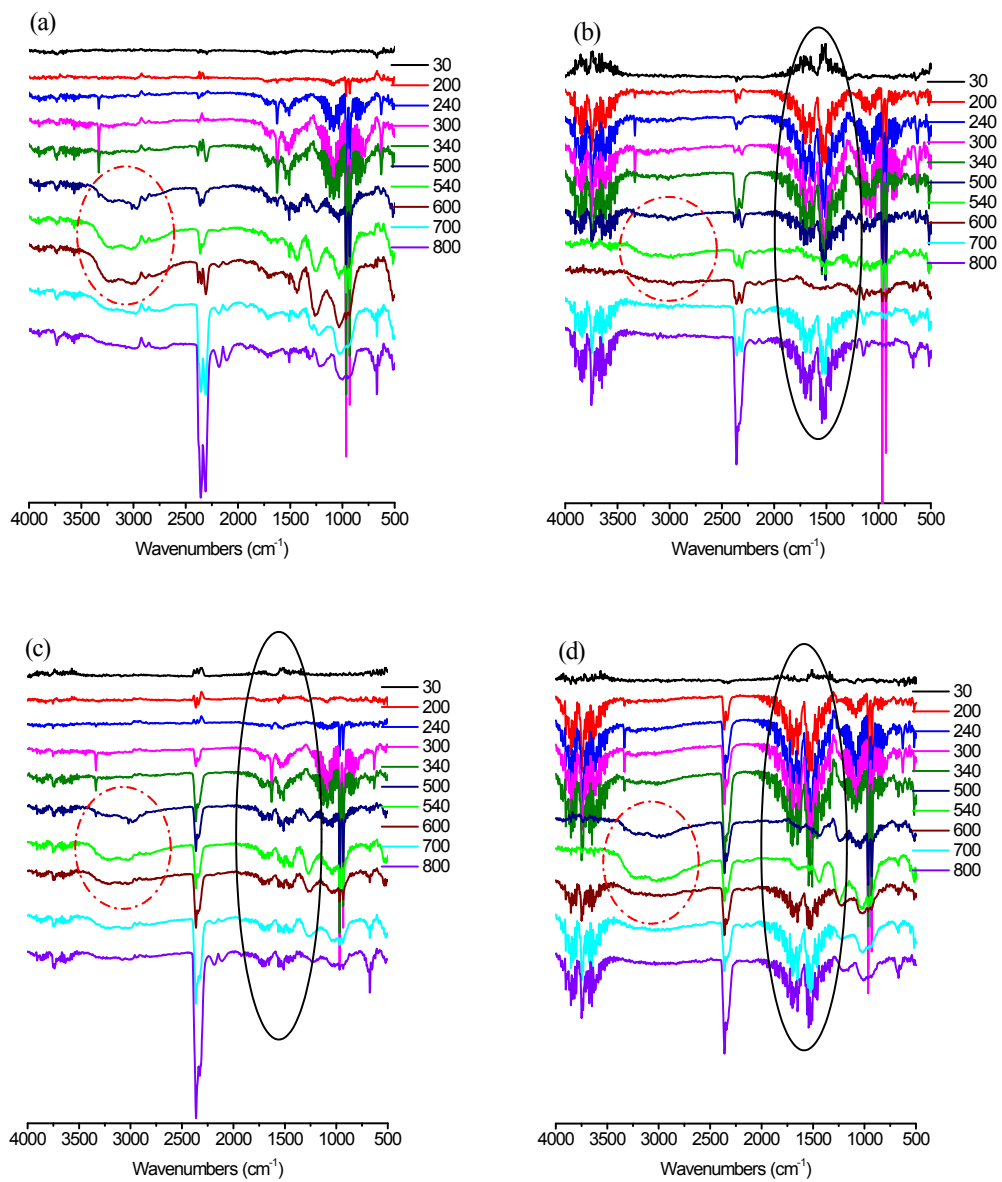

**Fig. S1** FTIR spectra of pyrolysis products for (a) IFR , (b) IFR/PIL1, (c) IFR/PIL2 and (d) IFR/PIL3 at different temperatures.
